# Supplementary material for: Evolution of DNA Methylation Patterns in the Brassicaceae is Driven by Differences in Genome Organization
Source: PLoS Genet. 2014 Nov 13;10(11):e1004785. doi: 10.1371/journal.pgen.1004785 (PMC4230842; doi:10.1371/journal.pgen.1004785)
Supplement: Table S4 — MR and DMR statistics by sample (A) and species (B). Mean and median length of region, total number of regions, and genomic bases covered by regions are shown. Sample statistics were calculated from the combination of biological replicates. (XLSX) [file pgen.1004785.s018.xlsx]

## Sheet: Sheet1
Table S4 A. MR and DMR statistics by sample
Species	Tissue	Treatment	Total MR	Mean MR length	Median MR length	Bases within MR
C. rubella	root	23°C	49282	559.773	275	27586732
C. rubella	shoot	23°C	42465	677.143	333	28754892
C. rubella	root	4°C	49920	538.31	274	26872421
C. rubella	shoot	4°C	48433	569.099	308	27563162
A. lyrata	root	23°C	62430	1044.7	505	65220895
A. lyrata	shoot	23°C	57995	1165	545	67564397
A. lyrata	root	4°C	62474	1049.73	506	65580766
A. lyrata	shoot	4°C	54175	1278.91	584	69284797
A. thaliana	root	23°C	28086	824.743	285	23163744
A. thaliana	shoot	23°C	24319	973.973	315	23686061
A. thaliana	root	4°C	28202	819.307	288	23106097
A. thaliana	shoot	4°C	22808	1042.35	342	23773934
Table S4 B. MR and DMR statistics by species
Species	Tissue	Treatment	Total MR	Mean MR length	Median MR length	Bases within MR	Total DMR	Mean DMR length	Median DMR length	Bases within DMR
C. rubella	NA	NA	NA	582.731	296	32137551	8105	237.909	196	1928252
A. lyrata	NA	NA	NA	1128.98	530	73342707	22168	331.097	249	7339750
A. thaliana	NA	NA	NA	906.347	306	25508482	4103	254.822	206	1045535
