# Supplementary material for: Evolution of DNA Methylation Patterns in the Brassicaceae is Driven by Differences in Genome Organization
Source: PLoS Genet. 2014 Nov 13;10(11):e1004785. doi: 10.1371/journal.pgen.1004785 (PMC4230842; doi:10.1371/journal.pgen.1004785)
Supplement: Table S6 — MR presence at genomic features. The number of genes in each species annotation that contain a MR is shown. Upstream refers to 1 kb upstream of the start codon. The number of orthologous genes with an overlapping MR is also shown. (XLSX) [file pgen.1004785.s020.xlsx]

## Sheet: Sheet1
Table S6. MR presence at genomic features
Species	Category	Exon	5'UTR	Intron	3'UTR	Upstream
C. rubella	all genes	6170	381	2579	715	4033
A. lyrata	all genes	5351	2021	4328	2209	8755
A. thaliana	all genes	5966	300	2027	557	3156
C. rubella	orthologs	2771	128	890	263	1635
A. lyrata	orthologs	348	94	597	196	2564
A. thaliana	orthologs	2775	86	711	221	1128
