# Supplementary material for: Evolution of DNA Methylation Patterns in the Brassicaceae is Driven by Differences in Genome Organization
Source: PLoS Genet. 2014 Nov 13;10(11):e1004785. doi: 10.1371/journal.pgen.1004785 (PMC4230842; doi:10.1371/journal.pgen.1004785)
Supplement: Table S10 — Three-way genome alignment site classes by context. Total numbers of CG, CHG, and CHH sites for each alignment site class are shown. (XLSX) [file pgen.1004785.s024.xlsx]

## Sheet: Sheet1
Table S10. Three-way genome alignment site classes by context
Species	Context	Aligned	All mC	3-way mC	2-way mC	Gain mC	Loss mC
C. rubella	CG	1634764	288600	116786	103181	68633	39683
C. rubella	CHG	2247539	8844	132	462	8250	336
C. rubella	CHH	11256558	16602	145	702	15755	408
A. lyrata	CG	1634764	305599	116786	111862	76951	31002
A. lyrata	CHG	2247539	8630	132	538	7960	260
A. lyrata	CHH	11256558	16924	145	748	16031	362
A. thaliana	CG	1634764	222366	116786	70685	34895	72179
A. thaliana	CHG	2247539	5466	132	596	4738	202
A. thaliana	CHH	11256558	9145	145	770	8230	340
