# Supplementary material for: Evolution of DNA Methylation Patterns in the Brassicaceae is Driven by Differences in Genome Organization
Source: PLoS Genet. 2014 Nov 13;10(11):e1004785. doi: 10.1371/journal.pgen.1004785 (PMC4230842; doi:10.1371/journal.pgen.1004785)
Supplement: Table S14 — P values of pairwise DMR overlap. To test the significance of DMR co-occurrence at orthologous genes a hypergeometric test was used. Significance of each test is shown here. (XLSX) [file pgen.1004785.s028.xlsx]

## Sheet: Sheet1
Table S14. P values of pairwise DMR overlap
Comparison	Exon	5'UTR	Intron	3'UTR	Upstream
C. rubella - A. lyrata	0.320759	1	0.000157145	1	1.10459e-07
C. rubella - A. thaliana	1	1	0.0264568	1	0.0838383
A. lyrata - A. thaliana	0.0234211	1	0.000129391	0.434572	0.0232496
